# Supplementary material for: Synthesis of nucleobase functionalised block copolymers towards precision self-assembly
Source: Royal Society of Chemistry journal article supplement (doi:10.1039/d4py00060a), 2024-01-01
Supplement: d4py00060a1.pdf [file d4py00060a1.pdf]

SUPPORTING INFORMATION

## **Synthesis of nucleobase functionalised block copolymers towards precision self-assembly**

Iyomali Abeysekera,<sup>a</sup> Lowie Maes<sup>b</sup> and Tanja Junkers<sup>a\*</sup>

## Table of Contents

|                                             |           |
|---------------------------------------------|-----------|
| <b>1. MATERIALS</b>                         | <b>1</b>  |
| <b>2. CHARACTERIZATION</b>                  | <b>1</b>  |
| <b>3. SYNTHETIC PROCEDURES</b>              | <b>2</b>  |
| 3.1. SYNTHESIS OF ADENINE ACRYLATE MONOMER  | 2         |
| 3.2. SYNTHESIS OF THYMINE ACRYLATE MONOMER  | 3         |
| 3.3. SYNTHESIS OF CYTOSINE ACRYLATE MONOMER | 3         |
| 3.4. SYNTHESIS OF URACIL ACRYLATE MONOMER   | 4         |
| 3.5. SYNTHESIS OF POLY(ADENINE ACRYLATE)    | 4         |
| 3.6. SYNTHESIS OF POLY (THYMINE ACRYLATE)   | 5         |
| 3.7. SYNTHESIS OF POLY(CYTOSINE ACRYLATE)   | 6         |
| 3.8. SYNTHESIS OF POLY(URACIL ACRYLATE)     | 6         |
| 3.9. SYNTHESIS OF PAA-B-PPEGMEA             | 7         |
| 3.10. SYNTHESIS OF PTA-B-PPEGMEA            | 8         |
| 3.11. SYNTHESIS OF PCA-B-PPEGMEA            | 8         |
| 3.12. SYNTHESIS OF PUA-B-PPEGMEA            | 9         |
| <b>4. MICELLE PARTICLE FORMATION</b>        | <b>10</b> |
| <b>5. S4 CHARACTERIZATION</b>               | <b>11</b> |

## 1. Materials

Adenine (A, Sigma Aldrich ,>99%), Thymine (T, Sigma Aldrich ,>98%), Cytosine (C, Sigma Aldrich, >98%), Uracil (U, Sigma Aldrich, 99%), 2,6-Di-tert-butyl-4-methylphenol (BHT, Alfa Aesar, 99%), Potassium carbonate ( $K_2CO_3$ , Acros Organics, 99+%), Triethylamine (TEA, Acros Organics, 99%), Potassium tert-butoxide (KtBuO, Acros Organics, 98+ %), 1,4-butanediol diacrylate (BDDA, Sigma Aldrich, 90%), Formic acid (HCOOH, Thermo fisher, 97%), 1-dodecanethiol (Acros Organics, 98%) and Carbon disulphide ( $CS_2$ , Acros organics, 99.9%) were used as received. 2,2'-azobis(2-methylpropionitrile) (AIBN, Sigma-Aldrich, 98%) was recrystallized twice from methanol prior to use. poly(ethylene glycol) methyl ether acrylate (PEGMEA, Sigma-Aldrich) were deionized over a column of activated basic alumina prior to use. The RAFT agent 2-(dodecylthiocarbonothioylthio)propionic acid (DoPAT) was synthesised according to literature procedures.<sup>1</sup> All other solvents and chemicals used are obtained from commercial sources (Acros, Sigma-Aldrich and Thermo Fisher) and used as received.

## 2. Characterization

**Nuclear Magnetic Resonance (NMR):** Proton ( $^1H$ ) NMR spectra were recorded in DMSO- $d_6$  on a Bruker Avance III nanobay NMR spectrometer (9.4 Tesla magnet) with a 5mm broadband autotunable probe with Z-gradients and BACS 60 tube autosampler operating at 400.20 MHz. The system has variable temperature capabilities. NMR spectra are collected and analysed in MestReNova software. Monomer degradation analysis via  $^1H$  NMR spectra were recorded periodically at a range of temperatures on a Bruker Avance III nanobay NMR spectrometer equipped with a 9.4 T magnet and 5 mm BBFO probe, operating at 400.20 MHz ( $^1H$ ). Spectra of samples in DMSO- $d_6$  were acquire using the standard  $^1H$  acquisition parameters: pulse program zg30 and 16 transients.  $^1H$  DOSY NMR spectra were recorded at 298 K with an air flow of  $400 L h^{-1}$  on a Bruker Avance III nanobay NMR spectrometer equipped with a 9.4 T magnet, GAB/2 gradient amplifier and 5 mm BBFO probe with z-gradient coil with maximum gradient strength of  $50 G cm^{-1}$ , operating at 400.20 MHz ( $^1H$ )

### **Gel Permeation Chromatography (GPC):**

Gel permeation chromatography (GPC) was performed on a system comprising a Shimadzu LC-20AT pump, a Shimadzu RID-20A refractive index detector, and an SPD-20A UV-visible detector. The GPC is equipped with a guard column (WAT054415) and 3× Waters GPC columns

(WAT044238, WAT044226, WAT044235, 300 mm × 7.8 mm). The eluent is DMF with 10 mM LiBr and eluted at 1 mL min<sup>-1</sup> for 45 min in total. The samples were dissolved in DMF with 10 mM LiBr and filtered through 0.20 μm syringe filters. A calibration curve was obtained from poly(methylmethacrylate) (PMMA) standards (Agilent) ranging from 960 to 1 568 000 g mol<sup>-1</sup>.

### Dynamic light Scatering (DLS)

Particle size and size distributions of self-assembled micelles are measured using DLS. These are performed with Litesizer 500 together with Kalliope software (Anton Paar, USA) which uses a 40 mW 658 nm Laser and includes three measurement angles for particle size determination.

### Transmission Electron Microscopy (TEM)

Transmission electron microscopy (TEM) was conducted at 200 kV using a Tecnai T20 FEGTEM. TEM samples were prepared on 300 mesh continuous film copper grids at 0.1% w/w and stained with a 2% w/w uranyl acetate solution.

## 3. Synthetic Procedures

### 3.1. Synthesis of adenine acrylate monomer

Adenine acrylate monomer (AAM) was synthesized according to literature.<sup>2</sup> Adenine (10.00 g, 1 eq.), K<sub>2</sub>CO<sub>3</sub> (0.46 g, 0.04 eq.) and BHT (0.69 g, 0.04 eq.) were suspended in 200 mL DMSO. The mixture was heated to 50 °C and stirred for 1 h. BDDA (28.00 mL, 2 eq.) was added to the reaction mixture. After 5 h, the mixture was diluted with water (1500 mL) and washed with hexane (350 mL) to remove excess of BDDA followed by extraction with DCM (3 x 200 mL). The organic phase was dried with MgSO<sub>4</sub>, filtered and concentrated under reduced pressure. The residual mixture was purified by column chromatography using a CHCl<sub>3</sub>/MeOH mixture (90/10 vol%). After removing the solvent and drying under vacuum 14.80 g of the pure product was obtained as a white solid (60%yield). <sup>1</sup>H-NMR (600 MHz, DMSO-d<sub>6</sub>, ppm) δ 8.20 (s, 1H), 8.16 (s, 1H), 7.25(broad singlet, 2H), 6.36 (dd, J = 17.3, 1.7 Hz, 1H), 6.21 (dd, J = 17.3, 10.3 Hz, 1H), 5.99 (dd, J = 10.3, 1.6 Hz, 1H), 4.44 (t, J = 6.7 Hz, 2H), 4.13–4.07 (m, 4H), 3.02 (t, J = 6.8 Hz, 2H), 1.62 (m, 4H).

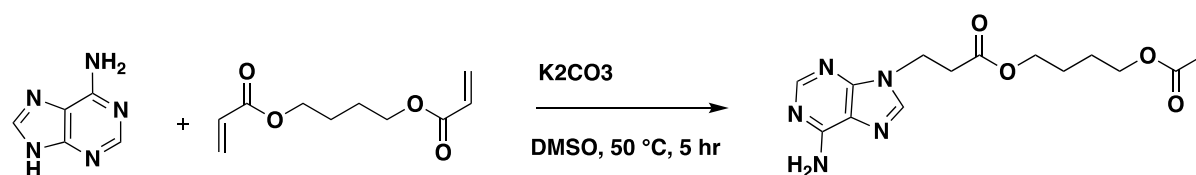

**Scheme S1:** Reaction scheme for the synthesis of AAM

### 3.2. Synthesis of thymine acrylate monomer

Thymine acrylate monomer was synthesized according to literature<sup>2</sup>. Thymine (1.00 g, 1 eq.), TEA (0.22 mL, 0.20 eq.) and BHT (0.06 g, 0.04 eq.) were suspended in 20 mL DMSO. The mixture was stirred for 1 h at room temperature. BDDA (3.00 mL, 2 eq.) was added and the reaction mixture was stirred for 24 h. Then, the mixture was diluted with water (150 mL) and washed with hexane (35 mL) to remove excess of BDDA followed by extraction with DCM (3 x 20 mL). The organic phase was dried with MgSO<sub>4</sub>, filtered and concentrated under reduced pressure. The residual mixture was purified by column chromatography using a CHCl<sub>3</sub>/MeOH mixture (95/5 vol%). After removing of the solvent and drying under vacuum 1.75 g of the pure product was obtained as a white solid (68% yield). <sup>1</sup>H-NMR (600 MHz, DMSO-d<sub>6</sub>, ppm) δ 11.25 (broad singlet, 1H), 7.49 (d, J = 1.2 Hz, 1H), 6.30 (dd, J = 17.3, 1.6 Hz, 1H), 6.18 (dd, J = 17.3, 10.3 Hz, 1H), 5.94 (dd, J = 10.3, 1.6 Hz, 1H), 4.11–4.05 (m, 4H), 3.84 (t, J = 6.8 Hz, 2H), 2.69 (t, J = 6.8 Hz, 2H), 1.73 (d, J = 1.1 Hz, 3H), 1.62 (m, 4H).

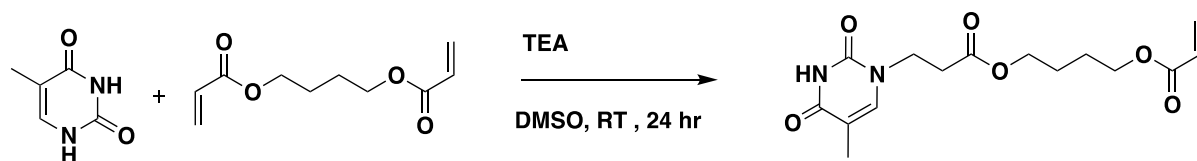

**Scheme S2:** Reaction scheme for the synthesis of TAM

### 3.3. Synthesis of cytosine acrylate monomer

Cytosine acrylate monomer was synthesized according to an adapted literature procedure.<sup>2</sup> Cytosine (4.00 g, 1 eq.), KtBuO (0.16 g, 0.04 eq.) and BHT (0.32 g, 0.04 eq.) were suspended in 80 mL DMSO. The mixture was stirred for 1 h at room temperature. BDDA (14.00 mL, 2 eq.) was added, and the reaction mixture was stirred for 24 h. Then, the mixture was diluted with water (600 mL) and washed with hexane (100 mL) to remove excess of BDDA followed by extraction with DCM (3 x 80 mL). The organic phase was dried with MgSO<sub>4</sub>, filtered and concentrated under reduced pressure. The residual mixture was purified by column chromatography using a CHCl<sub>3</sub>/MeOH mixture (93/7 vol%). After removing of the solvent and drying under vacuum 4.63 g of the pure product was obtained as a white solid (41% yield). <sup>1</sup>H-NMR (600 MHz, DMSO-d<sub>6</sub>, ppm) δ 7.54 (d, J = 7.2 Hz, 1H), 6.95 (broad doublet, J = 33.4 Hz,

2H), 6.30 (dd,  $J = 17.3, 1.6$  Hz, 1H), 6.16 (dd,  $J = 17.3, 10.3$  Hz, 1H), 5.93 (dd,  $J = 10.3, 1.6$  Hz, 1H), 5.63 (d,  $J = 7.2$  Hz, 1H), 4.11–4.04 (m, 4H), 3.83 (t,  $J = 6.7$  Hz, 2H), 2.67 (t,  $J = 6.7$  Hz, 2H), 1.61 (m, 4H).

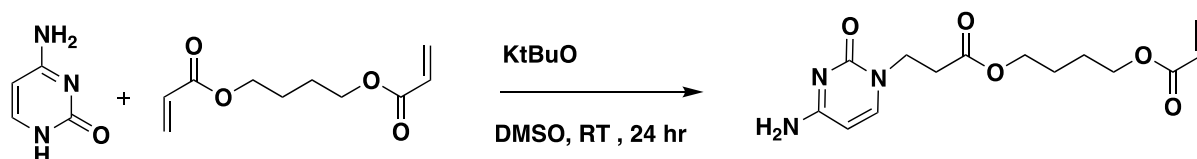

**Scheme S3:** Reaction scheme for the synthesis of CAM

### 3.4. Synthesis of uracil acrylate monomer

Uracil acrylate monomer was synthesized according to an adapted literature procedure. <sup>2</sup>Uracil (6.00 g, 1 eq.), TEA (1.50 mL, 0.20 eq.) and BHT (0.40 g, 0.03 eq.) were suspended in 120 mL DMSO. The mixture was stirred for 1 h at room temperature. BDDA (20.00 mL, 2 eq.) was added, and the reaction mixture was stirred for 24 h. Then, the mixture was diluted with water (900 mL) and washed with hexane (150 mL) to remove excess of BDDA followed by extraction with DCM (4 x 100 mL). The organic phase was dried with MgSO<sub>4</sub>, filtered, and concentrated under reduced pressure. The residual mixture was purified by column chromatography using a CHCl<sub>3</sub>/MeOH mixture (97/3 vol%). After removing of the solvent and drying under vacuum 8.63 g of the pure product was obtained as a white solid (52% yield). <sup>1</sup>H-NMR (600 MHz, DMSO-d<sub>6</sub>, ppm)  $\delta$  11.26 (broad singlet, 1H), 7.58 (d,  $J = 7.9$  Hz, 1H), 6.30 (dd,  $J = 16.8, 1.6$  Hz, 1H), 6.16 (dd,  $J = 17.3, 10.2$  Hz, 1H), 5.93 (dd,  $J = 10.3, 1.6$  Hz, 1H), 5.52 (d,  $J = 7.8$  Hz, 1H), 4.11–4.04 (m, 4H), 3.88 (t,  $J = 6.8$  Hz, 2H), 2.69 (t,  $J = 6.7$  Hz, 2H), 1.63 (p,  $J = 2.6$  Hz, 4H).

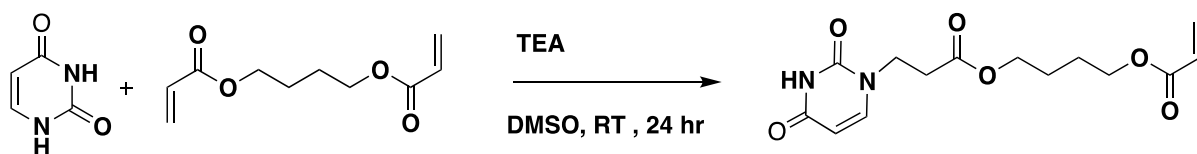

**Scheme S4:** Reaction scheme for the synthesis of UAM

### 3.5. Synthesis of poly(adenine acrylate)

For the synthesis of poly (adenine acrylate) (pAA) 3.0 mmol (1.00 g, 25 eq.) of the monomer AAM, 0.01 mmol (1.0 mg, 0.05 eq.) of AIBN, 0.12 mmol (0.042 g, 1 eq.) of DoPAT RAFT agent

and 6 mL of DMSO were added into a glass vial with a magnetic stirrer. The glass vial was sealed with a rubber septum. The solution was degassed for 10 min with Ar and the mixture was subsequently reacted in for 45 min at 100 °C. Next, the polymerisation was quenched by exposure to ambient air after which the polymer was precipitated in water and centrifuged. The supernatant was discarded, and the polymer dried under high vacuum. The conversion was calculated by NMR to be 86%.

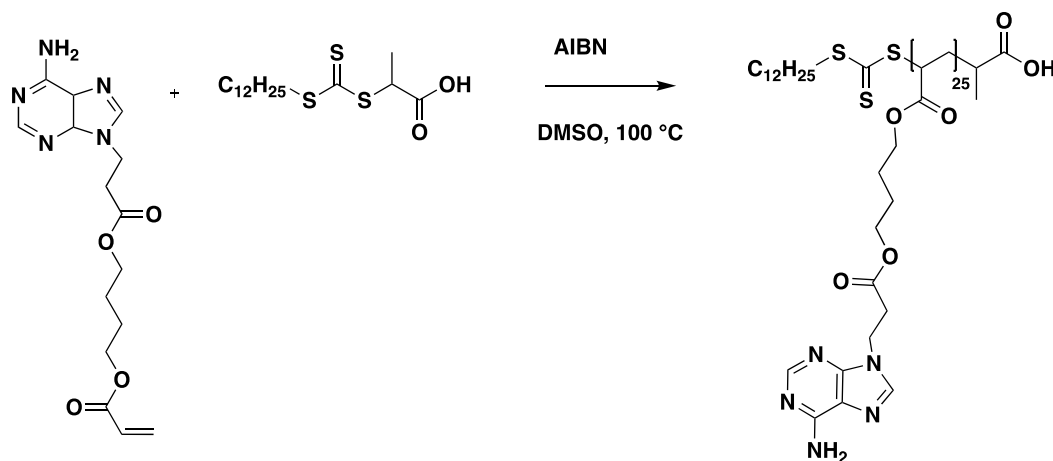

**Scheme S5:** Reaction scheme for the synthesis of pAA25

### 3.6. Synthesis of poly (thymine acrylate)

For the synthesis of poly (thymine acrylate) (pTA) 3.0 mmol (1.00 g, 25 eq.) of the monomer AAM, 0.01 mmol (1.0 mg, 0.05 eq.) of AIBN, 0.12 mmol (0.043 g, 1 eq.) of DoPAT RAFT agent and 6 mL of DMSO were added into a glass vial with a magnetic stirrer. The glass vial was sealed with a rubber septum. The solution was degassed for 10 min with Ar and the mixture was subsequently reacted for 45 min at 100 °C. Next, the polymerisation was quenched by exposure to ambient air after which the polymer was precipitated in water and centrifuged. The supernatant was discarded, and the polymer dried under high vacuum. The conversion calculated by NMR was 88%.

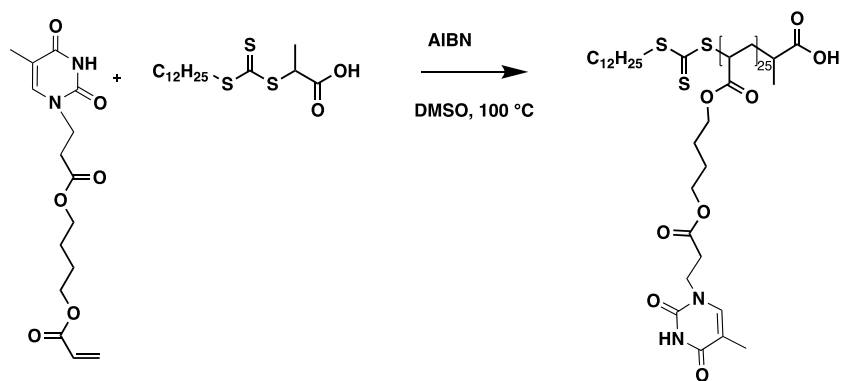

**Scheme S6:** Reaction scheme for the synthesis of pTA25

### 3.7. Synthesis of poly(cytosine acrylate)

For the production of poly (cytosine acrylate) (pCA) 3.2 mmol (1.00 g, 25 eq.) of the monomer CAM, 0.01 mmol (2.0 mg, 0.1 eq.) of AIBN, 0.12 mmol (0.045 g, 1 eq.) of DoPAT RAFT agent and 6 mL of DMSO were added into a glass vial with a magnetic stirrer. The glass vial was sealed with a rubber septum. The solution was degassed for 10 min with Ar and the mixture was subsequently reacted in for 45 min at 100 °C. Next, the polymerisation was quenched by exposure to ambient air after which the polymer was precipitated in water and centrifuged. The supernatant was discarded, and the polymer dried under high vacuum. The conversion calculated by NMR was 93%.

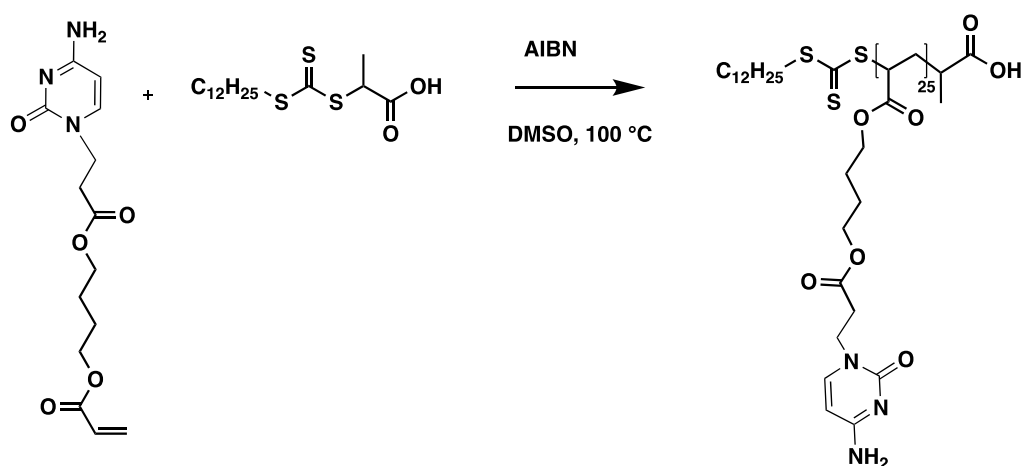

**Scheme S7:** Reaction scheme for the synthesis of pCA25

### 3.8. Synthesis of poly(uracil acrylate)

For the synthesis of poly (uracil acrylate) (pUA) 3.2 mmol (1.00 g, 25 eq.) of the monomer UAM, 0.01 mmol (2.0 mg, 0.1 eq.) of AIBN, 0.12 mmol (0.045 g, 1 eq.) of DoPAT RAFT agent



and 6 mL of DMSO were added into a glass vial with a magnetic stirrer. The glass vial was sealed with a rubber septum. The solution was degassed for 10 min with Ar and the mixture was reacted for 45 min at 100 °C. Next, the polymerisation was quenched by exposure to ambient air after which the polymer was precipitated in water and centrifuged. The supernatant was discarded, and the polymer dried under high vacuum. The conversion calculated by NMR was 85%.

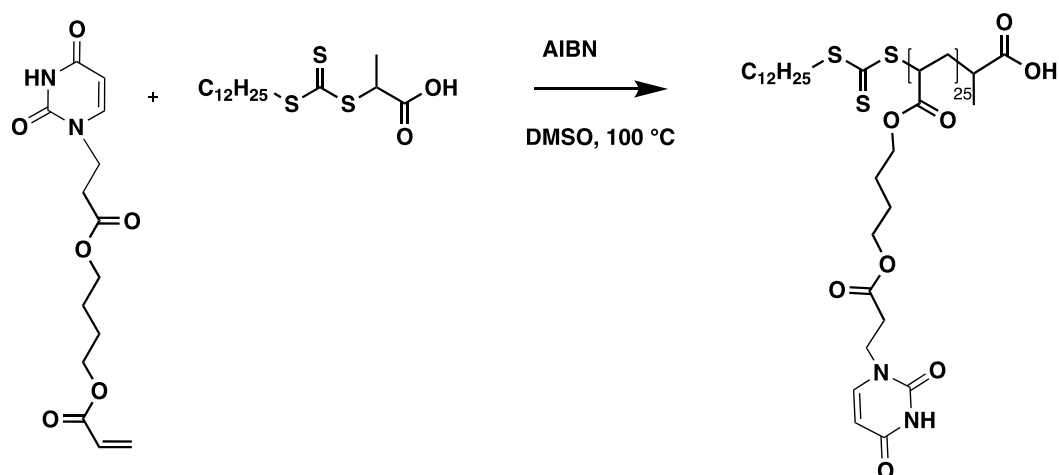

**Scheme S8:** Reaction scheme for the synthesis of pUA25

### 3.9. Synthesis of pAA-b-pPEGMEA

For the synthesis of pAA-b-pPEGMEA 0.04 mmol (0.250 g, 1 eq.) of the macro-RAFT agent pAA, 0.002 mmol (0.3 mg, 0.05 eq.) of AIBN, 2.63 mmol (1.2671 g, 60 eq.) of PEGMEA monomer and 5 mL of DMSO were added into a glass vial with a magnetic stirrer. The glass vial was sealed with a rubber septum. The solution was degassed for 10 min with argon and the mixture was subsequently reacted for 45 min at 100 °C. Next, the polymerisation was quenched by exposure to ambient air after which the polymer was dried under high vacuum. The conversion calculated by NMR was 87%.

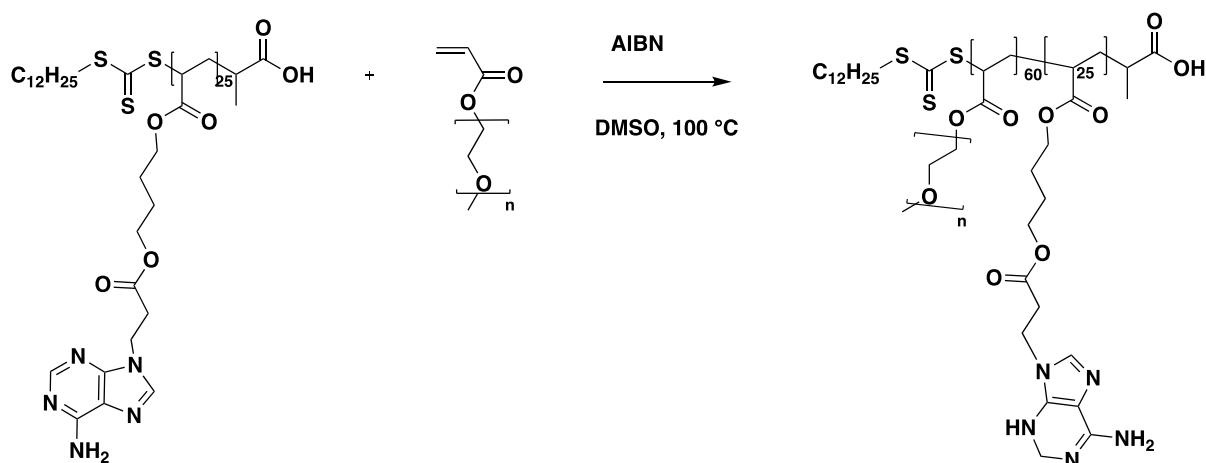

**Scheme S9:** Reaction scheme for the synthesis of pAA25-b-PEG60

### 3.10. Synthesis of pTA-b-pPEGMEA

For the synthesis of pTA-b-pPEGMEA 0.03 mmol (0.250 g, 1 eq.) of the macro-RAFT agent pTA, 0.0007 mmol (0.1 mg, 0.1 eq.) of AIBN, 1.76 mmol (0.847 g, 60 eq.) of PEGMEA monomer and 3.5 mL of DMSO were added into a glass vial with a magnetic stirrer. The glass vial was sealed with a rubber septum. The solution was degassed for 10 min with argon and the mixture was subsequently reacted for 45 min at 100 °C. Next, the polymerisation was quenched by exposure to ambient air after which the polymer was dried under high vacuum. The conversion calculated by NMR was 93%.

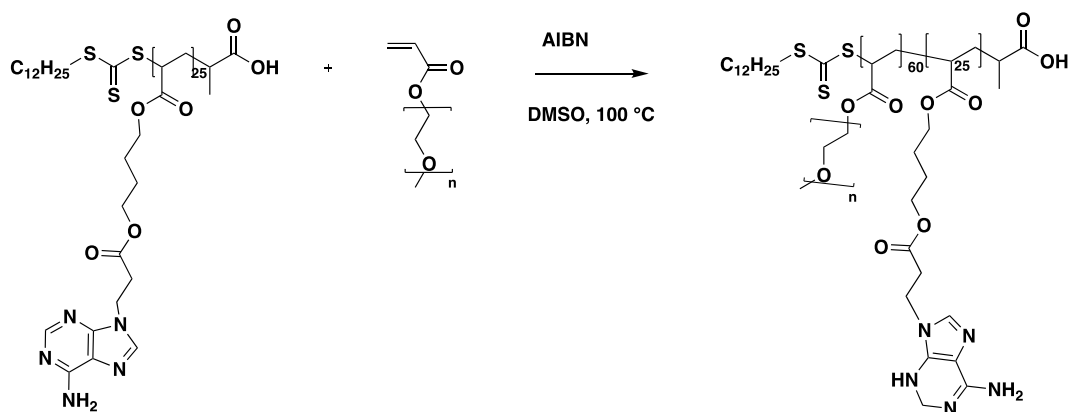

**Scheme S10:** Reaction scheme for the synthesis of pTA25-b-PEG60

### 3.11. Synthesis of pCA-b-pPEGMEA

For the production of pCA-b-pPEGMEA 0.04 mmol (0.25 g, 1 eq.) of the macro-RAFT agent pCA, 0.0007 mmol (0.1 mg, 0.1 eq.) of AIBN, 2.53 mmol (1.21 g, 60 eq.) of PEGMEA monomer

and 3.5 mL of DMSO were added into a glass vial with a magnetic stirrer. The glass vial was sealed with a rubber septum. The solution was degassed for 10 min with Ar and the mixture was subsequently reacted for 45 min at 100 °C. Next, the polymerisation was quenched by exposure to ambient air after which the polymer was dried under high vacuum. The conversion calculated by NMR was 91%.

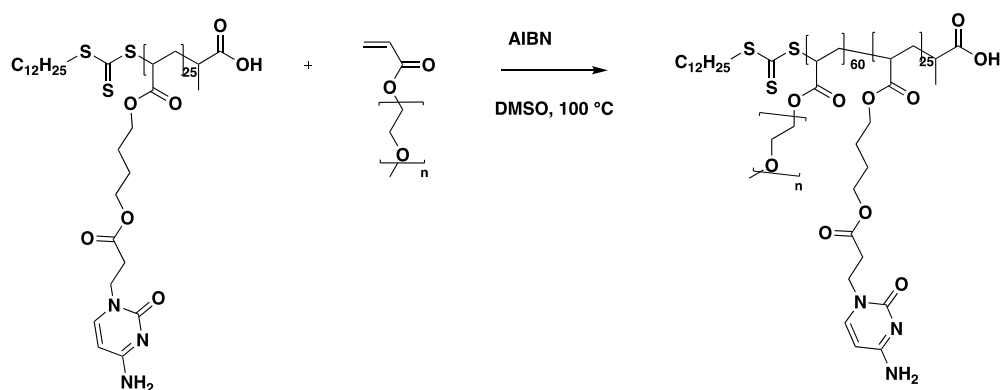

**Scheme S11:** Reaction scheme for the synthesis of pCA25-b-PEG60

### 3.12. Synthesis of pUA-b-pPEGMEA

For the production of pUA-b-pPEGMEA 0.05 mmol (0.25 g, 1 eq.) of the macro-RAFT agent pUA, 0.0007 mmol (0.1 mg, 0.1 eq.) of AIBN, 3.2 mmol (1.53 g, 60 eq.) of PEGMEA monomer and 3.2 mL of DMSO were added into a glass vial with a magnetic stirrer. The glass vial was sealed with a rubber septum. The solution was degassed for 10 min with argon and the mixture was subsequently reacted for 45 min at 100 °C. Next, the polymerisation was quenched by exposure to ambient air after which the polymer was dried under high vacuum. The conversion calculated by NMR was 92%.

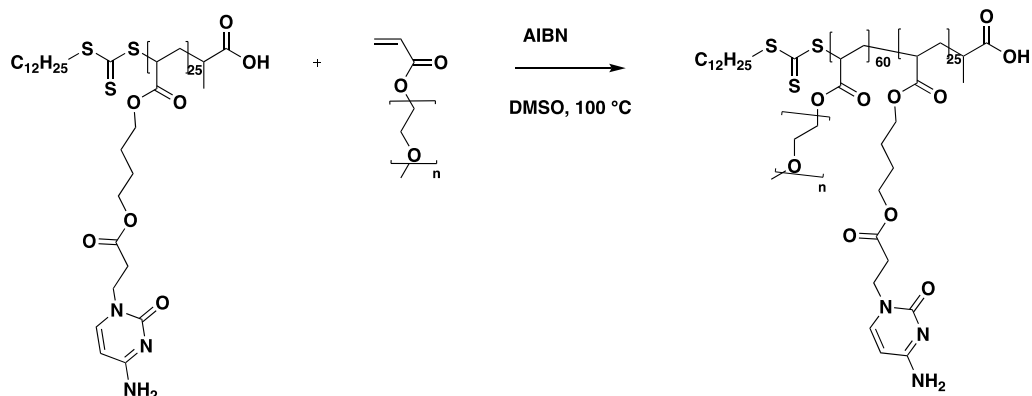

**Scheme S12:** Reaction scheme for the synthesis of pUA25-b-PEG60

#### 4. Micelle particle formation

Micelle formation was performed in a flow reactor.<sup>3</sup> The custom-build design consisted of PFA tubing (2 mL internal volume, 1 mm internal diameter) connected to a static mixing tee. Syringe pumps were used to pump 2 reactor solutions. One syringe contained 10 mg·mL<sup>-1</sup> block copolymer in DMF operated at 0.2 mL·min<sup>-1</sup> while the other held pure deionised water that was pumped at a flow rate of 1.8 mL·min<sup>-1</sup>. The reactor was stabilized for 2 minutes before particle samples were collected over a 1-minute time period. Sample distributions were then measured on DLS.

The complementary and non-complementary polymer blends were prepared by mixing equimolar ratios of pAA25-b-PEG60 with either pTA25-b-PEG60 or pCA25-b-PEG60 and stirring overnight to allow H bonding formation. The final polymer concentration was kept at 10 mg·mL<sup>-1</sup>.

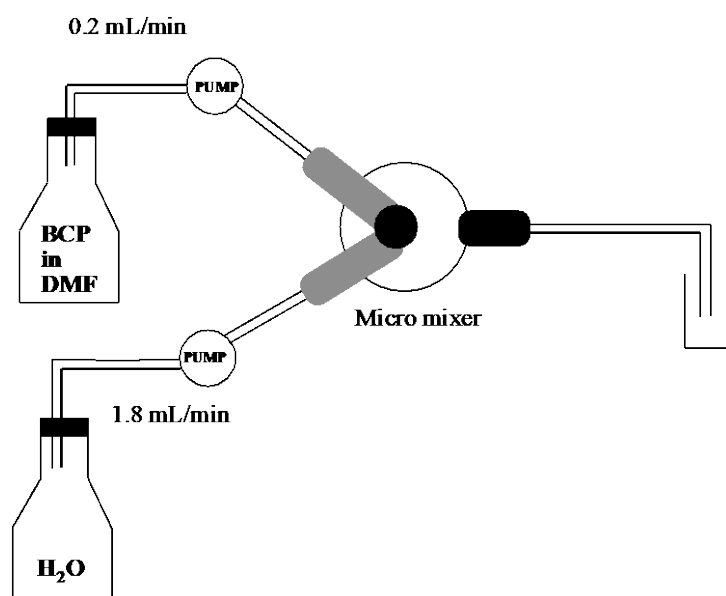

**Figure S1:** Flow set up for micelle formation

## 5. S4 Characterization

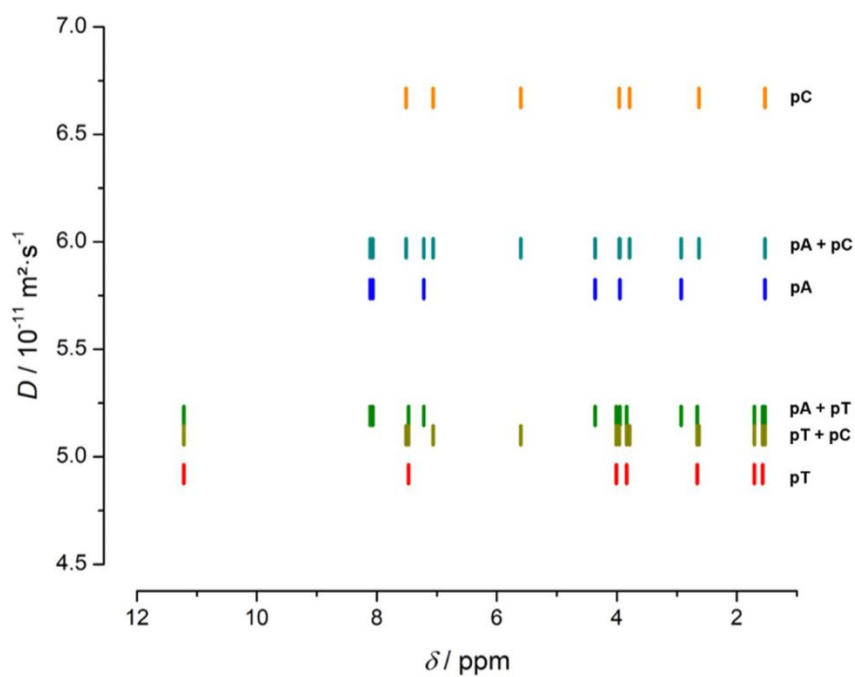

**Figure S2:** Comparison of DOSY NMR spectra of nucleobase functionalized acrylates and their blends.

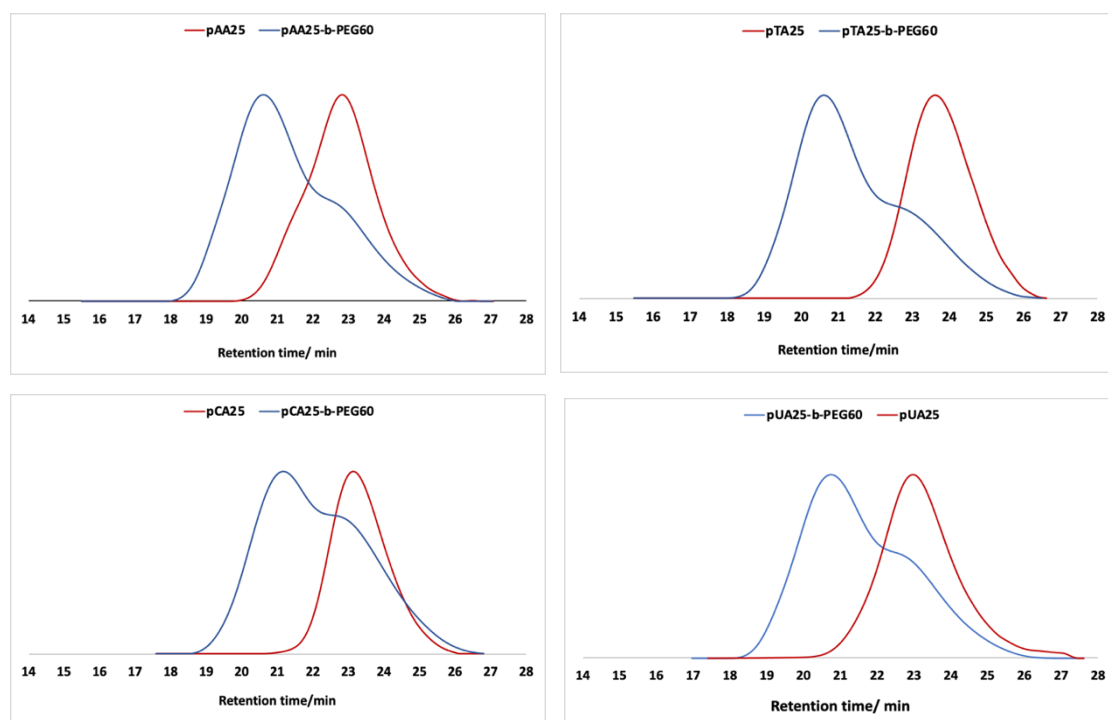

**Figure S3:** SEC elugrams of pAA25, pTA25, pCA25 and pUA25 after chain extension with PEGMEA

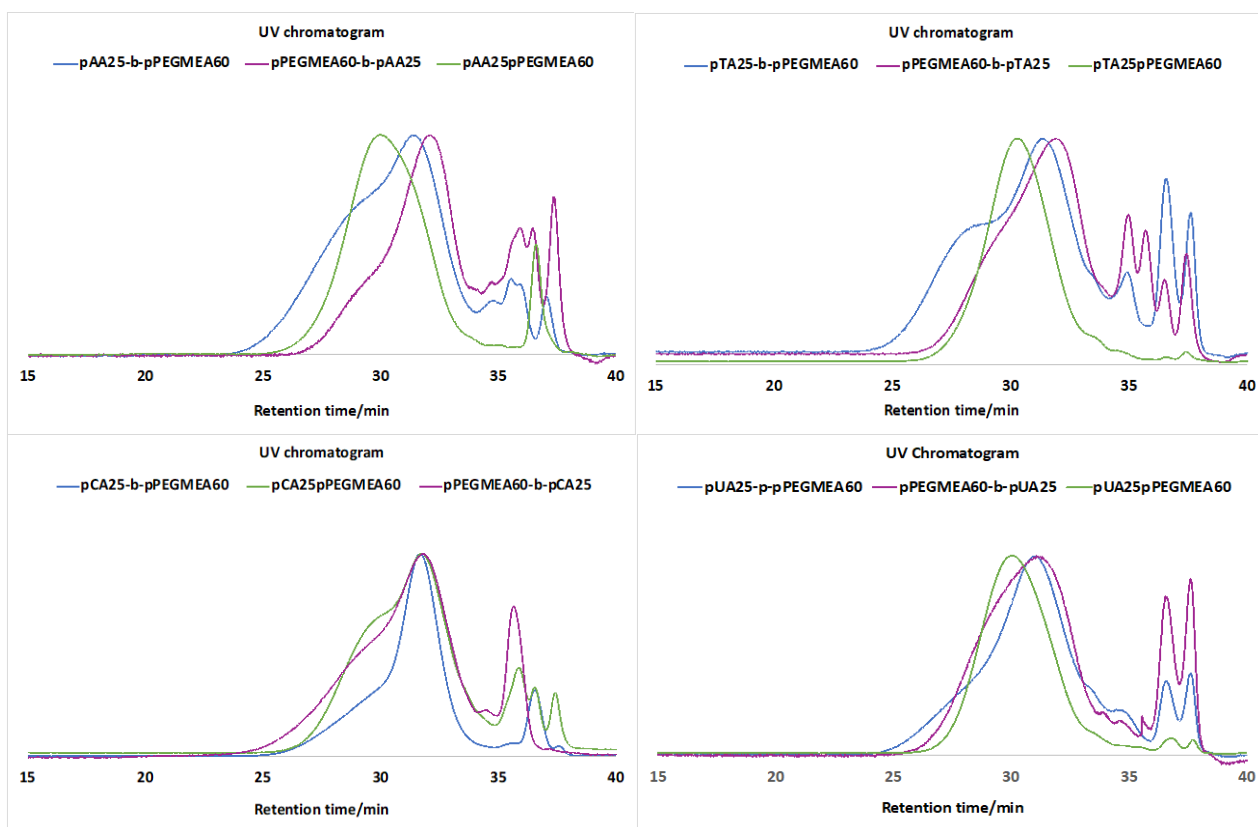

**Figure S4:** UV chromatograms for SEC for the block copolymers

**Table S1:** Kinetic profile of the block copolymers synthesized in one pot

| Polymer          | Time/min | Conversion (%) | MW SEC/<br>g/mol | PDI  |
|------------------|----------|----------------|------------------|------|
| pAA25            | 10       | 29.9           | 5443             | 1.12 |
|                  | 20       | 58.1           | 7362             | 1.11 |
|                  | 30       | 67.5           | 7741             | 1.10 |
|                  | 40       | 73.5           | 8086             | 1.11 |
| pAA25-b-PEGMEA60 | 10       | 61.5           | 9909             | 1.23 |
|                  | 20       | 75.3           | 9152             | 1.24 |
|                  | 30       | 81.5           | 12303            | 1.23 |
|                  | 40       | 84.6           | 12459            | 1.30 |
| pTA25            | 10       | 32.7           | 7678             | 1.16 |
|                  | 20       | 41.3           | 8097             | 1.18 |
|                  | 30       | 52.4           | 8399             | 1.18 |
|                  | 40       | 68.2           | 8680             | 1.17 |
| pTA25-b-PEGMEA60 | 10       | 30.7           | 10797            | 1.24 |
|                  | 20       | 53.8           | 10986            | 1.27 |
|                  | 30       | 66.9           | 10981            | 1.27 |
|                  | 40       | 71.5           | 12615            | 1.29 |
| pCA25            | 10       | 61.4           | 6388             | 1.10 |
|                  | 20       | 70.3           | 6576             | 1.11 |
|                  | 30       | 74.3           | 6444             | 1.14 |
|                  | 40       | 78.2           | 6761             | 1.14 |
| pCA25-b-PEGMEA60 | 10       | 58.5           | 9863             | 1.31 |
|                  | 20       | 72.7           | 9794             | 1.31 |
|                  | 30       | 79.8           | 10027            | 1.32 |
|                  | 40       | 83.1           | 10277            | 1.38 |
| pUA25            | 10       | 61.5           | 5458             | 1.13 |
|                  | 20       | 75.1           | 5818             | 1.13 |
|                  | 30       | 80.7           | 6000             | 1.13 |
|                  | 40       | 87.5           | 6293             | 1.14 |
| pUA25-b-PEGMEA60 | 10       | 47.2           | 10620            | 1.25 |
|                  | 20       | 67.4           | 11154            | 1.27 |
|                  | 30       | 72.9           | 11306            | 1.29 |
|                  | 40       | 79.5           | 11057            | 1.32 |

**Table S2:** Summary of the DLS data obtained for different block copolymers

| Polymer                                     | Intensity<br>$D_{avg}/nm$ | Volume<br>$D_{avg}/nm$ | Number<br>$D_{avg}/nm$ | Dispersity |
|---------------------------------------------|---------------------------|------------------------|------------------------|------------|
| 1-pAA25-b-PEG60                             | 72.45                     | 49.41                  | 38.93                  | 0.19       |
| 2-pTA25-b-PEG60                             | 86.07                     | 103.98                 | 74.31                  | 0.13       |
| 3-pCA25-b-PEG60                             | 271.14                    | 315.12                 | 220.9                  | 0.25       |
| 4-pUA25-b-PEG60                             | 153.33                    | 122.22                 | 100.38                 | 0.21       |
| 5-pAA25-b-PEG60 + pTA25-b-PEG60             | 64.62                     | 76.06                  | 56.68                  | 0.06       |
| 6-pAA25-b-PEG60 + pCA25-b-PEG60             | 114.91                    | 101.97                 | 91.78                  | 0.12       |
| 7-PEG60-b-pAA25                             | 59.82                     | 42.94                  | 35.09                  | 0.23       |
| 8-PEG60-b-pTA25                             | 104.04                    | 85.67                  | 73.75                  | 0.15       |
| 9-PEG60-b-pCA25                             | 353.82                    | 245.00                 | 232.72                 | 0.26       |
| 10-PEG60-b-pUA25                            | 125.37                    | 114.67                 | 105.42                 | 0.12       |
| 11- PEG60-b-pAA25 + PEG60-b-pTA25           | 89.00                     | 75.39                  | 66.09                  | 0.10       |
| 12-PEG60-b-pAA25 + PEG60-b-pCA25            | 127.11                    | 107.20                 | 93.11                  | 0.12       |
| 13-pAA25-b-PEG60 one pot                    | 95.22                     | 51.45                  | 34.85                  | 0.23       |
| 14-pTA25-b-PEG60 one pot                    | 71.63                     | 61.00                  | 53.58                  | 0.15       |
| 15-pCA25-b-PEG60 one pot                    | 241.07                    | 179.31                 | 199.51                 | 0.18       |
| 16-pUA25-b-PEG60 one pot                    | 121.95                    | 105.66                 | 93.67                  | 0.17       |
| 17-pAA25-b-PEG60 + pTA25-b-PEG60 one<br>pot | 81.35                     | 59.56                  | 48.46                  | 0.21       |
| 18-pAA25-b-PEG60 + pCA25-b-PEG60 one<br>pot | 133.03                    | 108.86                 | 92.72                  | 0.21       |



**Table S3:** Overview of the number average diameter and dispersity for various nucleobase-PEGMEA block copolymer blends.

| Polymer | Mixing ratio | Number $D_{avg}$ /<br>nm | PDI  |
|---------|--------------|--------------------------|------|
| 1+2     | 1:1          | 56.68                    | 0.06 |
| 1+2     | 1:2          | 51.46                    | 0.21 |
| 1+2     | 1:3          | 54.29                    | 0.19 |
| 1+2     | 1:4          | 55.22                    | 0.21 |
| 1+2     | 1:5          | 55.23                    | 0.21 |
| 1+3     | 1:1          | 91.72                    | 0.12 |
| 1+3     | 1:2          | 109.73                   | 0.12 |
| 1+3     | 1:3          | 113.55                   | 0.15 |
| 1+3     | 1:4          | 131.79                   | 0.19 |
| 1+3     | 1:5          | 183.64                   | 0.24 |

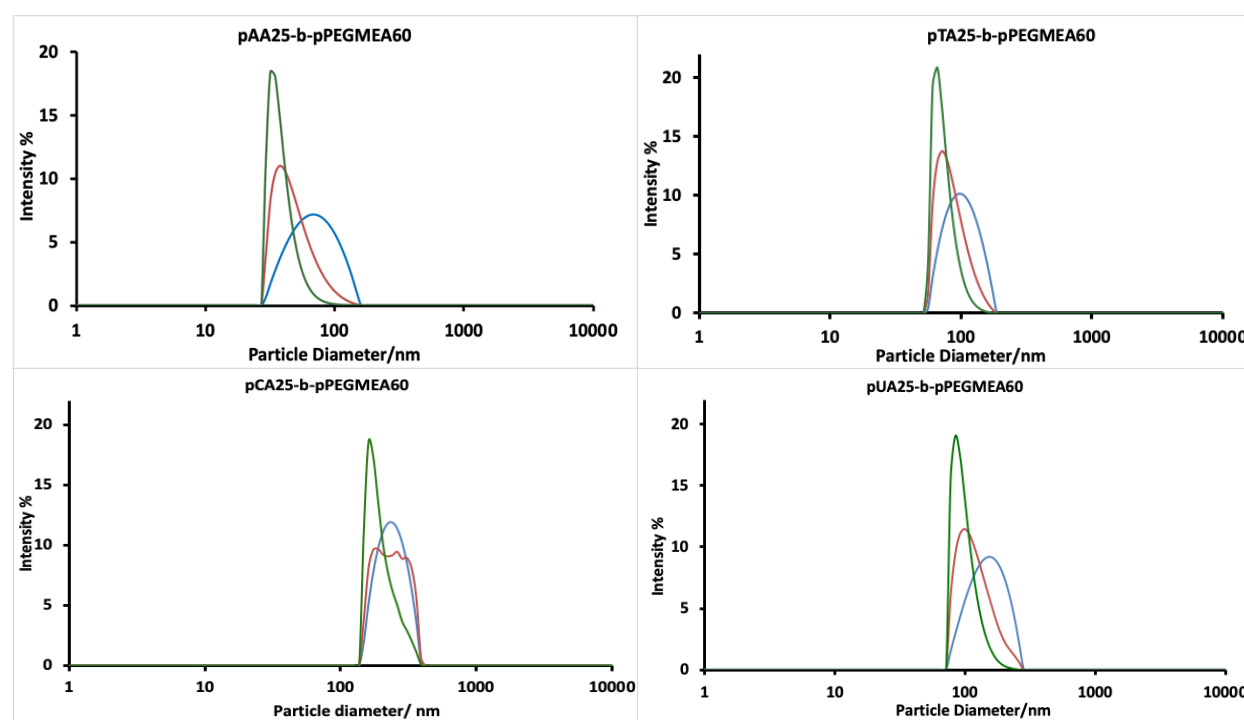

**Figure S5:** DLS results for BCPs where the nucleobase containing block is synthesized first. Showing the Intensity in (Blue), number (green) and volume (red)

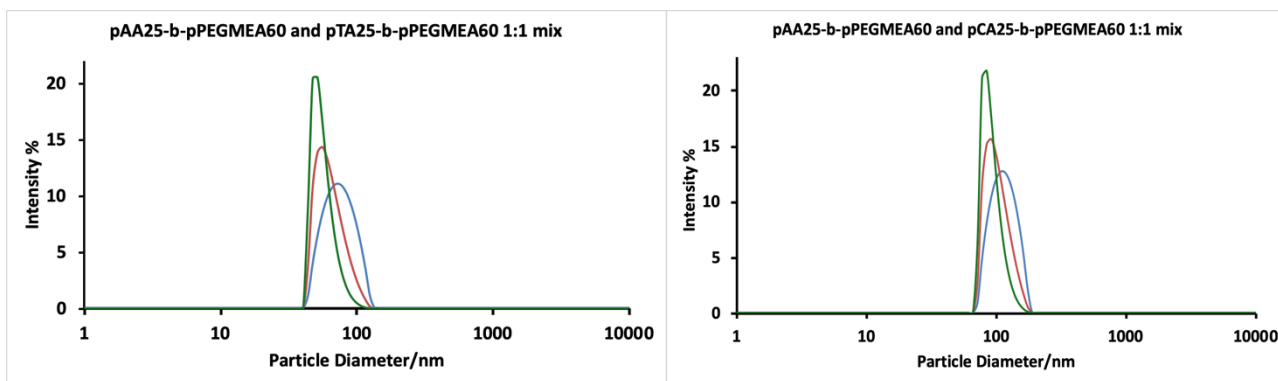

**Figure S6:** DLS results for 1:1 BCP blends of pAA25-b-pPEGMEA60 with pTA25-b-pPEGMEA60 and pCA25-b-pPEGMEA60 Showing the Intensity in (Blue), number (green) and volume (red)

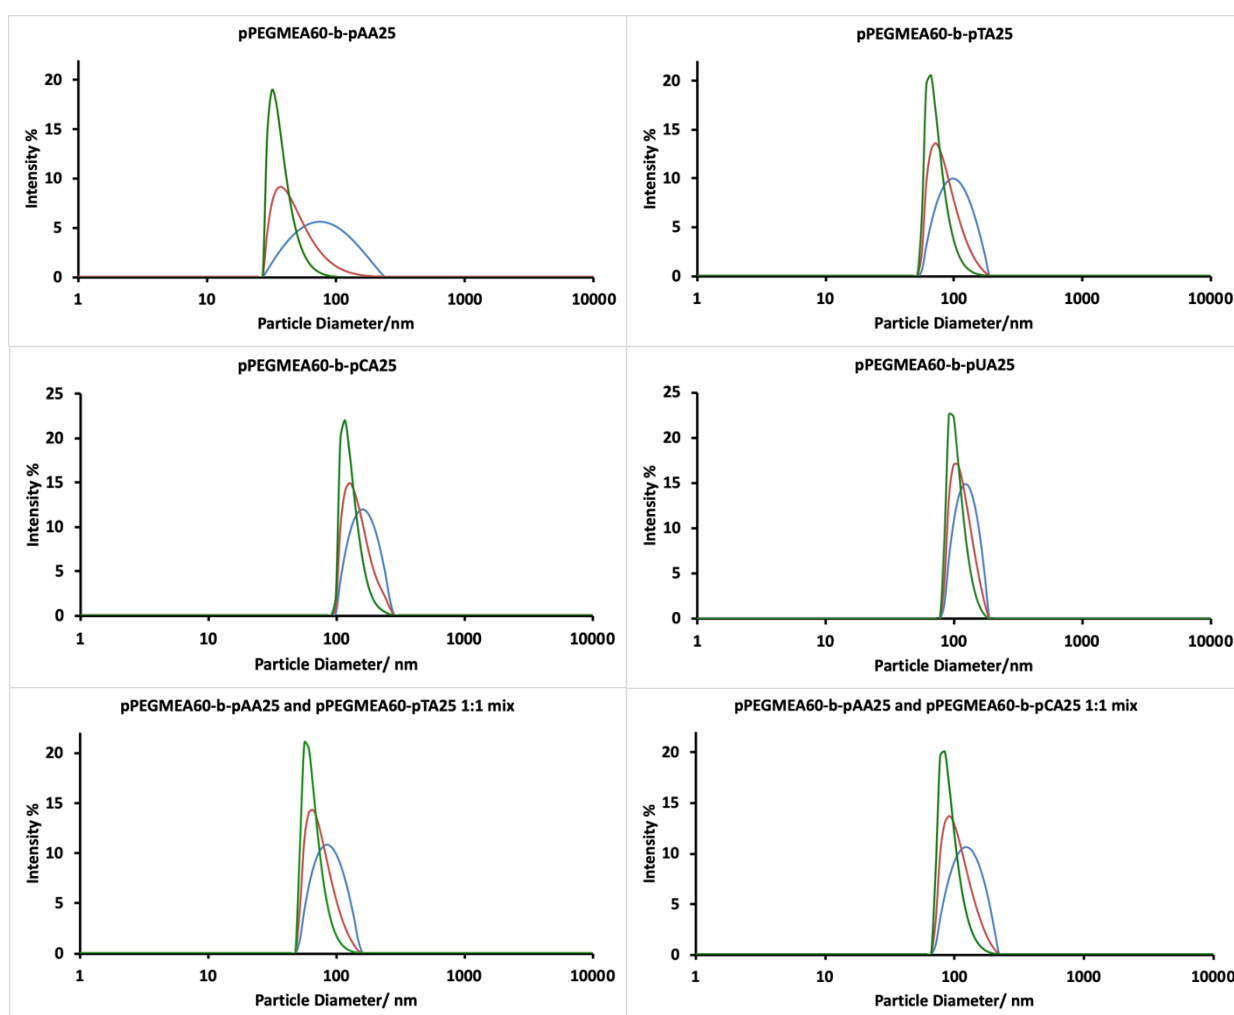

**Figure S7:** DLS results for BCPs where the PEGMEA block is synthesized first. Showing the Intensity in (Blue), number (green) and volume (red)

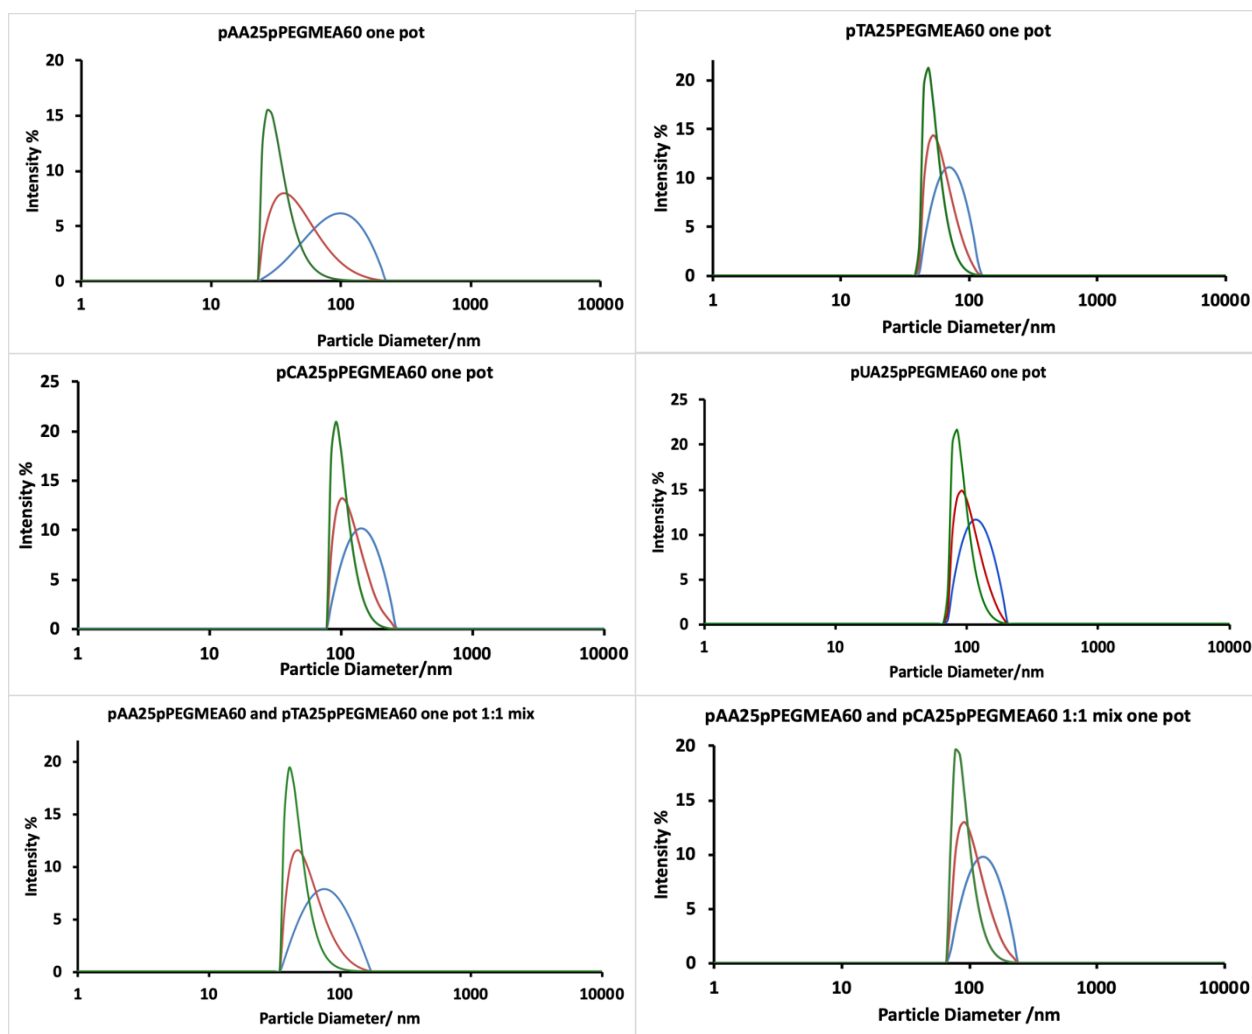

**Figure S8:** DLS results for BCPs synthesized in one pot. Showing the Intensity in (Blue), number (green) and volume (red)

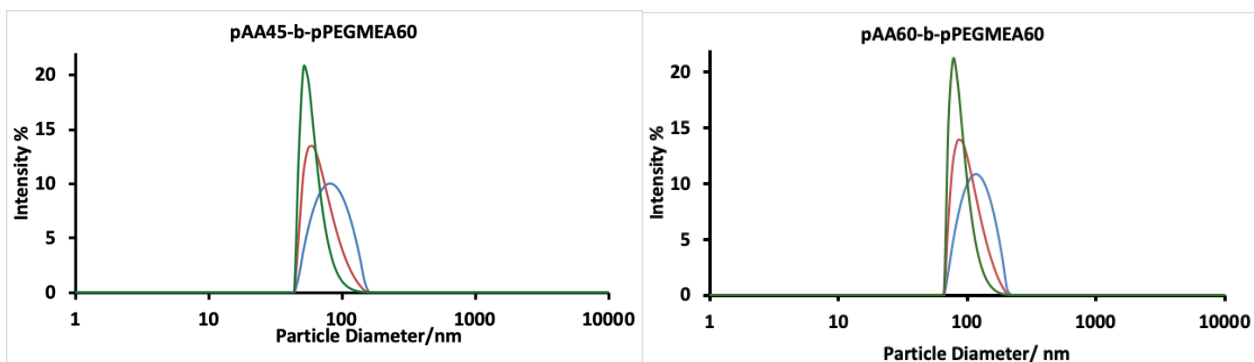

**Figure S9:** DLS results for pAA45-b-pPEGMEA60 and pAA60-b-pPEGMEA60 Showing the Intensity in (Blue), number (green) and volume (red)

**Table S4:** DLS results of polymers at elevated temperatures

| Polymer | Diameter at 40 °C/ nm |        |        |      | Diameter at 80 °C/ nm |        |        |      |
|---------|-----------------------|--------|--------|------|-----------------------|--------|--------|------|
|         | I                     | V      | N      | PDI  | I                     | V      | N      | PDI  |
| 1       | 132.92                | 80.05  | 58.15  | 0.23 | 153.58                | 5.18   | 4.91   | 0.24 |
| 2       | 174.23                | 158.61 | 143.38 | 0.06 | 167.08                | 1.45   | 1.40   | 0.28 |
| 3       | 133.48                | 6.15   | 5.82   | 0.23 | 137.09                | 3.76   | 3.5    | 0.23 |
| 4       | 137.74                | 122.21 | 110    | 0.07 | 158.73                | 8.42   | 6.89   | 0.28 |
| 5       | 117.64                | 95.03  | 80.34  | 0.15 | 164.40                | 136.04 | 113.92 | 0.10 |
| 6       | 165.58                | 119.65 | 90.22  | 0.23 | 130.61                | 112.48 | 99.62  | 0.12 |

## References

- (1) Ferguson, C. J.; Hughes, R. J.; Nguyen, D.; Pham, B. T. T.; Gilbert, R. G.; Serelis, A. K.; Such, C. H.; Hawket, B. S. Ab Initio Emulsion Polymerization by RAFT-Controlled Self-Assembly. *Macromolecules* **2005**, *38* (6), 2191–2204. <https://doi.org/10.1021/ma048787r>.
- (2) Maes, L.; Massana Roqueuro, D.; Pitet, L. M.; Adriaensens, P.; Junkers, T. Sequence-Defined Nucleobase Containing Oligomers: Via Reversible Addition-Fragmentation Chain Transfer Single Monomer Addition. *Polym. Chem.* **2020**, *11* (12), 2027–2033. <https://doi.org/10.1039/c9py01853k>.
- (3) Buckinx, A.-L.; Rubens, M.; Cameron, N. R.; Bakkali-Hassani, C.; Sokolova, A.; Junkers, T. The Effects of Molecular Weight Dispersity on Block Copolymer Self-Assembly. *Polym. Chem.* **2022**, *13* (23), 3444–3450. <https://doi.org/10.1039/D2PY00318J>.
